# Supplementary material
Source: MDPI journal article supplement (https://www.mdpi.com/2073-4441/11/8/1578)
Supplement: s1 [file s1]

**Appendix A. Basic statistic of observed daily rainfall data in each stations****Table 1.** Basic statistic of daily rainfall(01:Sokcho)

| Statistics | Max(mm/day) | Mean(mm/day) | Standard deviation | Coefficient of variation |
|------------|-------------|--------------|--------------------|--------------------------|
| Value      | 314.200     | 3.765        | 14.100             | 3.745                    |

**Table 2.** Basic statistic of daily rainfall(02 :Wonju)

| Statistics | Max(mm/day) | Mean(mm/day) | Standard deviation | Coefficient of variation |
|------------|-------------|--------------|--------------------|--------------------------|
| Value      | 305.000     | 3.625        | 13.289             | 3.666                    |

**Table 3.** Basic statistic of daily rainfall(03 : Inje)

| Statistics | Max(mm/day) | Mean(mm/day) | Standard deviation | Coefficient of variation |
|------------|-------------|--------------|--------------------|--------------------------|
| Value      | 275.800     | 3.258        | 12.687             | 3.894                    |

**Table 4.** Basic statistic of daily rainfall(04 : Chuncheon)

| Statistics | Max(mm/day) | Mean(mm/day) | Standard deviation | Coefficient of variation |
|------------|-------------|--------------|--------------------|--------------------------|
| Value      | 308.500     | 3.577        | 13.986             | 3.910                    |

**Table 5.** Basic statistic of daily rainfall(05 : Hongcheon)

| Statistics | Max(mm/day) | Mean(mm/day) | Standard deviation | Coefficient of variation |
|------------|-------------|--------------|--------------------|--------------------------|
| Value      | 276.000     | 3.684        | 14.174             | 3.867                    |

**Table 6.** Basic statistic of daily rainfall(06 : Suwon)

| Statistics | Max(mm/day) | Mean(mm/day) | Standard deviation | Coefficient of variation |
|------------|-------------|--------------|--------------------|--------------------------|
| Value      | 333.200     | 3.576        | 14.072             | 3.935                    |

**Table 7.** Basic statistic of daily rainfall(07 : Yanpyeong)

| <b>Statistics</b> | <b>Max(mm/day)</b> | <b>Mean(mm/day)</b> | <b>Standard deviation</b> | <b>Coefficient of variation</b> |
|-------------------|--------------------|---------------------|---------------------------|---------------------------------|
| Value             | 346.000            | 3.801               | 15.026                    | 3.953                           |

**Table 8.** Basic statistic of daily rainfall 08 : Icheon)

| <b>Statistics</b> | <b>Max(mm/day)</b> | <b>Mean(mm/day)</b> | <b>Standard deviation</b> | <b>Coefficient of variation</b> |
|-------------------|--------------------|---------------------|---------------------------|---------------------------------|
| Value             | 304.000            | 3.653               | 13.967                    | 3.824                           |

**Table 9.** Basic statistic of daily rainfall(09 : Geoje)

| <b>Statistics</b> | <b>Max(mm/day)</b> | <b>Mean(mm/day)</b> | <b>Standard deviation</b> | <b>Coefficient of variation</b> |
|-------------------|--------------------|---------------------|---------------------------|---------------------------------|
| Value             | 438.300            | 5.103               | 18.542                    | 3.634                           |

**Table 10.** Basic statistic of daily rainfall(10 : Geochang)

| <b>Statistics</b> | <b>Max(mm/day)</b> | <b>Mean(mm/day)</b> | <b>Standard deviation</b> | <b>Coefficient of variation</b> |
|-------------------|--------------------|---------------------|---------------------------|---------------------------------|
| Value             | 253.000            | 3.545               | 12.650                    | 3.569                           |

**Table 11.** Basic statistic of daily rainfall(11 : Namhae)

| <b>Statistics</b> | <b>Max(mm/day)</b> | <b>Mean(mm/day)</b> | <b>Standard deviation</b> | <b>Coefficient of variation</b> |
|-------------------|--------------------|---------------------|---------------------------|---------------------------------|
| Value             | 410.000            | 5.112               | 18.439                    | 3.607                           |

**Table 12.** Basic statistic of daily rainfall(12 : Miryang)

| <b>Statistics</b> | <b>Max(mm/day)</b> | <b>Mean(mm/day)</b> | <b>Standard deviation</b> | <b>Coefficient of variation</b> |
|-------------------|--------------------|---------------------|---------------------------|---------------------------------|
| Value             | 245.000            | 3.372               | 12.256                    | 3.635                           |

**Table 13.** Basic statistic of daily rainfall(13 : Sancheong)

| <b>Statistics</b> | <b>Max(mm/day)</b> | <b>Mean(mm/day)</b> | <b>Standard deviation</b> | <b>Coefficient of variation</b> |
|-------------------|--------------------|---------------------|---------------------------|---------------------------------|
| Value             | 332.500            | 4.230               | 16.339                    | 3.863                           |

**Table 14.** Basic statistic of daily rainfall (14 : Jinju)

| <b>Statistics</b> | <b>Max(mm/day)</b> | <b>Mean(mm/day)</b> | <b>Standard deviation</b> | <b>Coefficient of variation</b> |
|-------------------|--------------------|---------------------|---------------------------|---------------------------------|
| Value             | 318.000            | 4.158               | 14.876                    | 3.577                           |

**Table 15.** Basic statistic of daily rainfall(15 : Tongyeong)

| <b>Statistics</b> | <b>Max(mm/day)</b> | <b>Mean(mm/day)</b> | <b>Standard deviation</b> | <b>Coefficient of variation</b> |
|-------------------|--------------------|---------------------|---------------------------|---------------------------------|
| Value             | 273.200            | 4.035               | 14.237                    | 3.528                           |

**Table 16.** Basic statistic of daily rainfall(16 : Hapcheon)

| <b>Statistics</b> | <b>Max(mm/day)</b> | <b>Mean(mm/day)</b> | <b>Standard deviation</b> | <b>Coefficient of variation</b> |
|-------------------|--------------------|---------------------|---------------------------|---------------------------------|
| Value             | 288.500            | 3.546               | 13.310                    | 3.5754                          |

**Table 17.** Basic statistic of daily rainfall(17 : Gumi)

| <b>Statistics</b> | <b>Max(mm/day)</b> | <b>Mean(mm/day)</b> | <b>Standard deviation</b> | <b>Coefficient of variation</b> |
|-------------------|--------------------|---------------------|---------------------------|---------------------------------|
| Value             | 221.000            | 2.950               | 10.670                    | 3.617                           |

**Table 18.** Basic statistic of daily rainfall(18 : Mugyeong)

| <b>Statistics</b> | <b>Max(mm/day)</b> | <b>Mean(mm/day)</b> | <b>Standard deviation</b> | <b>Coefficient of variation</b> |
|-------------------|--------------------|---------------------|---------------------------|---------------------------------|
| Value             | 173.300            | 3.448               | 11.905                    | 3.453                           |

**Table 19.** Basic statistic of daily rainfall(19 : Yeongdeok)

| <b>Statistics</b> | <b>Max(mm/day)</b> | <b>Mean(mm/day)</b> | <b>Standard deviation</b> | <b>Coefficient of variation</b> |
|-------------------|--------------------|---------------------|---------------------------|---------------------------------|
| Value             | 296.000            | 2.915               | 11.049                    | 3.790                           |

**Table 20.** Basic statistic of daily rainfall(20 : Yeongju)

| <b>Statistics</b> | <b>Max(mm/day)</b> | <b>Mean(mm/day)</b> | <b>Standard deviation</b> | <b>Coefficient of variation</b> |
|-------------------|--------------------|---------------------|---------------------------|---------------------------------|
| Value             | 259.500            | 3.532               | 12.734                    | 3.606                           |

**Table 21.** Basic statistic of daily rainfall(21 : Yeongcheon)

| Statistics | Max(mm/day) | Mean(mm/day) | Standard deviation | Coefficient of variation |
|------------|-------------|--------------|--------------------|--------------------------|
| Value      | 190.100     | 2.895        | 10.511             | 3.631                    |

**Table 22.** Basic statistic of daily rainfall(22 : Uljin)

| Statistics | Max(mm/day) | Mean(mm/day) | Standard deviation | Coefficient of variation |
|------------|-------------|--------------|--------------------|--------------------------|
| Value      | 279.000     | 3.082        | 11.280             | 3.660                    |

**Table 23.** Basic statistic of daily rainfall(23 : Ulseong)

| Statistics | Max(mm/day) | Mean(mm/day) | Standard deviation | Coefficient of variation |
|------------|-------------|--------------|--------------------|--------------------------|
| Value      | 215.500     | 2.758        | 9.995              | 3.624                    |

**Table 24.** Basic statistic of daily rainfall(24 : Pohang)

| Statistics | Max(mm/day) | Mean(mm/day) | Standard deviation | Coefficient of variation |
|------------|-------------|--------------|--------------------|--------------------------|
| Value      | 516.400     | 3.156        | 12.193             | 3.863                    |

**Table 25.** Basic statistic of daily rainfall(25 : Goheung)

| Statistics | Max(mm/day) | Mean(mm/day) | Standard deviation | Coefficient of variation |
|------------|-------------|--------------|--------------------|--------------------------|
| Value      | 487.100     | 3.978        | 15.588             | 3.919                    |

**Table 26.** Basic statistic of daily rainfall(26 : Mokpo)

| Statistics | Max(mm/day) | Mean(mm/day) | Standard deviation | Coefficient of variation |
|------------|-------------|--------------|--------------------|--------------------------|
| Value      | 394.700     | 3.202        | 11.688             | 3.650                    |

**Table 27.** Basic statistic of daily rainfall(27 : Yeosu)

| Statistics | Max(mm/day) | Mean(mm/day) | Standard deviation | Coefficient of variation |
|------------|-------------|--------------|--------------------|--------------------------|
| Value      | 308.900     | 3.984        | 14.518             | 3.644                    |

**Table 28.** Basic statistic of daily rainfall(28 : Wando)

| Statistics | Max(mm/day) | Mean(mm/day) | Standard deviation | Coefficient of variation |
|------------|-------------|--------------|--------------------|--------------------------|
| Value      | 414.300     | 4.197        | 15.483             | 3.689                    |

**Table 29.** Basic statistic of daily rainfall(29 : Jangheung)

| Statistics | Max(mm/day) | Mean(mm/day) | Standard deviation | Coefficient of variation |
|------------|-------------|--------------|--------------------|--------------------------|
| Value      | 547.400     | 4.069        | 15.429             | 3.807                    |

**Table 30.** Basic statistic of daily rainfall(30 : Juam)

| Statistics | Max(mm/day) | Mean(mm/day) | Standard deviation | Coefficient of variation |
|------------|-------------|--------------|--------------------|--------------------------|
| Value      | 254.500     | 3.500        | 13.839             | 3.954                    |

**Table 31.** Basic statistic of daily rainfall(31 : Haenam)

| Statistics | Max(mm/day) | Mean(mm/day) | Standard deviation | Coefficient of variation |
|------------|-------------|--------------|--------------------|--------------------------|
| Value      | 477.500     | 3.606        | 13.850             | 3.841                    |

**Table 32.** Basic statistic of daily rainfall(32 : Gunsan)

| Statistics | Max(mm/day) | Mean(mm/day) | Standard deviation | Coefficient of variation |
|------------|-------------|--------------|--------------------|--------------------------|
| Value      | 310.000     | 3.367        | 12.501             | 3.713                    |

**Table 33.** Basic statistic of daily rainfall(33 : Namwon)

| Statistics | Max(mm/day) | Mean(mm/day) | Standard deviation | Coefficient of variation |
|------------|-------------|--------------|--------------------|--------------------------|
| Value      | 122.400     | 0.354        | 3.535              | 9.996                    |

**Table 34.** Basic statistic of daily rainfall(34 : Buan)

| Statistics | Max(mm/day) | Mean(mm/day) | Standard deviation | Coefficient of variation |
|------------|-------------|--------------|--------------------|--------------------------|
| Value      | 250.500     | 3.394        | 12.004             | 3.537                    |

**Table 35.** Basic statistic of daily rainfall(35 : Imsil)

| Statistics | Max(mm/day) | Mean(mm/day) | Standard deviation | Coefficient of variation |
|------------|-------------|--------------|--------------------|--------------------------|
| Value      | 234.000     | 3.703        | 12.250             | 3.308                    |

**Table 36.** Basic statistic of daily rainfall(36 : Jeongju)

| Statistics | Max(mm/day) | Mean(mm/day) | Standard deviation | Coefficient of variation |
|------------|-------------|--------------|--------------------|--------------------------|
| Value      | 249.500     | 3.544        | 11.845             | 3.343                    |

**Table 37.** Basic statistic of daily rainfall(37 : Jeongeup)

| Statistics | Max(mm/day) | Mean(mm/day) | Standard deviation | Coefficient of variation |
|------------|-------------|--------------|--------------------|--------------------------|
| Value      | 420.000     | 3.581        | 12.238             | 3.418                    |

**Table 38.** Basic statistic of daily rainfall(38 : Geumsan)

| Statistics | Max(mm/day) | Mean(mm/day) | Standard deviation | Coefficient of variation |
|------------|-------------|--------------|--------------------|--------------------------|
| Value      | 202.000     | 3.522        | 12.181             | 3.458                    |

**Table 39.** Basic statistic of daily rainfall(39 : Boryeong)

| Statistics | Max(mm/day) | Mean(mm/day) | Standard deviation | Coefficient of variation |
|------------|-------------|--------------|--------------------|--------------------------|
| Value      | 361.500     | 3.362        | 13.103             | 3.898                    |

**Table 40.** Basic statistic of daily rainfall(40 : Buyeo)

| Statistics | Max(mm/day) | Mean(mm/day) | Standard deviation | Coefficient of variation |
|------------|-------------|--------------|--------------------|--------------------------|
| Value      | 517.600     | 3.680        | 13.798             | 3.741                    |

**Table 41.** Basic statistic of daily rainfall(41 : Seosan)

| Statistics | Max(mm/day) | Mean(mm/day) | Standard deviation | Coefficient of variation |
|------------|-------------|--------------|--------------------|--------------------------|
| Value      | 274.500     | 3.454        | 13.034             | 3.774                    |

**Table 42.** Basic statistic of daily rainfall(42 : Cheonan)

| Statistics | Max(mm/day) | Mean(mm/day) | Standard deviation | Coefficient of variation |
|------------|-------------|--------------|--------------------|--------------------------|
| Value      | 273.500     | 3.357        | 12.447             | 3.707                    |

**Table 43.** Basic statistic of daily rainfall(43 : Boeun)

| Statistics | Max(mm/day) | Mean(mm/day) | Standard deviation | Coefficient of variation |
|------------|-------------|--------------|--------------------|--------------------------|
| Value      | 407.500     | 3.585        | 12.856             | 3.586                    |

**Table 44.** Basic statistic of daily rainfall(44 : Jecheon)

| Statistics | Max(mm/day) | Mean(mm/day) | Standard deviation | Coefficient of variation |
|------------|-------------|--------------|--------------------|--------------------------|
| Value      | 276.500     | 3.765        | 13.713             | 3.642                    |

**Table 45.** Basic statistic of daily rainfall(45 : Cehongju)

| Statistics | Max(mm/day) | Mean(mm/day) | Standard deviation | Coefficient of variation |
|------------|-------------|--------------|--------------------|--------------------------|
| Value      | 293.000     | 3.409        | 12.399             | 3.637                    |

**Table 46.** Basic statistic of daily rainfall(46 : Chupungyeong)

| Statistics | Max(mm/day) | Mean(mm/day) | Standard deviation | Coefficient of variation |
|------------|-------------|--------------|--------------------|--------------------------|
| Value      | 280.000     | 3.235        | 11.224             | 3.469                    |

**Table 47.** Basic statistic of daily rainfall(47 : Chungju)

| Statistics | Max(mm/day) | Mean(mm/day) | Standard deviation | Coefficient of variation |
|------------|-------------|--------------|--------------------|--------------------------|
| Value      | 263.000     | 3.332        | 12.155             | 3.648                    |

**Table 48.** Basic statistic of daily rainfall(48 : Ganghwa)

| Statistics | Max(mm/day) | Mean(mm/day) | Standard deviation | Coefficient of variation |
|------------|-------------|--------------|--------------------|--------------------------|
| Value      | 481.000     | 3.554        | 15.157             | 4.264                    |

**Table 49.** Basic statistic of daily rainfall(49 : Incheon)

| Statistics | Max(mm/day) | Mean(mm/day) | Standard deviation | Coefficient of variation |
|------------|-------------|--------------|--------------------|--------------------------|
| Value      | 302.500     | 3.291        | 13.297             | 4.040                    |

**Table 50.** Basic statistic of daily rainfall(50 : Gwangju)

| Statistics | Max(mm/day) | Mean(mm/day) | Standard deviation | Coefficient of variation |
|------------|-------------|--------------|--------------------|--------------------------|
| Value      | 335.600     | 3.780        | 13.138             | 3.475                    |

**Table 51.** Basic statistic of daily rainfall(51 : Daegu)

| Statistics | Max(mm/day) | Mean(mm/day) | Standard deviation | Coefficient of variation |
|------------|-------------|--------------|--------------------|--------------------------|
| Value      | 225.800     | 2.942        | 10.871             | 3.694                    |

**Table 52.** Basic statistic of daily rainfall(52 : Daejeon)

| Statistics | Max(mm/day) | Mean(mm/day) | Standard deviation | Coefficient of variation |
|------------|-------------|--------------|--------------------|--------------------------|
| Value      | 303.300     | 3.726        | 13.311             | 3.573                    |

**Table 53.** Basic statistic of daily rainfall(53 : Busan)

| Statistics | Max(mm/day) | Mean(mm/day) | Standard deviation | Coefficient of variation |
|------------|-------------|--------------|--------------------|--------------------------|
| Value      | 439.00      | 4.192        | 15.523             | 3.703                    |

**Table 54.** Basic statistic of daily rainfall(54 : Seoul)

| Statistics | Max(mm/day) | Mean(mm/day) | Standard deviation | Coefficient of variation |
|------------|-------------|--------------|--------------------|--------------------------|
| Value      | 332.800     | 3.858        | 15.226             | 3.947                    |

**Table 55.** Basic statistic of daily rainfall(55 : Ulsan)

| Statistics | Max(mm/day) | Mean(mm/day) | Standard deviation | Coefficient of variation |
|------------|-------------|--------------|--------------------|--------------------------|
| Value      | 417.800     | 2.995        | 12.404             | 4.141                    |



## Appendix B. Result of BDS statistics

**Table 1.** BDS statistic results of daily rainfall(01:Sokcho)

|              | <b>r = 0.5s</b> | <b>r = 1.0s</b> | <b>r = 1.5s</b> | <b>r = 2.0s</b> | <b>C.L</b>    |
|--------------|-----------------|-----------------|-----------------|-----------------|---------------|
| <b>m = 2</b> | 28.5167         | 27.0377         | 25.628          | 24.6676         | [-1.96, 1.96] |
| <b>m = 3</b> | 25.3581         | 23.7877         | 22.5191         | 21.5227         | [-1.96, 1.96] |
| <b>m = 4</b> | 22.9454         | 21.2562         | 19.9793         | 19.1294         | [-1.96, 1.96] |
| <b>m = 5</b> | 20.6473         | 18.7644         | 17.6101         | 16.8831         | [-1.96, 1.96] |

**Table 2.** BDS statistic results of daily rainfall(02 :Wonju)

|              | <b>r = 0.5s</b> | <b>r = 1.0s</b> | <b>r = 1.5s</b> | <b>r = 2.0s</b> | <b>C.L</b>    |
|--------------|-----------------|-----------------|-----------------|-----------------|---------------|
| <b>m = 2</b> | 25.2352         | 24.9396         | 24.7051         | 24.8817         | [-1.96, 1.96] |
| <b>m = 3</b> | 23.2225         | 23.6314         | 23.8193         | 23.9929         | [-1.96, 1.96] |
| <b>m = 4</b> | 25.4796         | 25.6969         | 25.7932         | 25.8515         | [-1.96, 1.96] |
| <b>m = 5</b> | 24.3735         | 24.185          | 23.8570         | 23.7304         | [-1.96, 1.96] |

**Table 3.** BDS statistic results of daily rainfall(03 : Inje)

|              | <b>r = 0.5s</b> | <b>r = 1.0s</b> | <b>r = 1.5s</b> | <b>r = 2.0s</b> | <b>C.L</b>    |
|--------------|-----------------|-----------------|-----------------|-----------------|---------------|
| <b>m = 2</b> | 26.0117         | 25.1856         | 24.6249         | 24.5439         | [-1.96, 1.96] |
| <b>m = 3</b> | 23.4454         | 23.1489         | 22.7063         | 22.7263         | [-1.96, 1.96] |
| <b>m = 4</b> | 23.9937         | 23.8327         | 23.7322         | 23.7288         | [-1.96, 1.96] |
| <b>m = 5</b> | 23.0827         | 23.2678         | 23.0524         | 23.2308         | [-1.96, 1.96] |

**Table 4.** BDS statistic results of daily rainfall(04 : Chuncheon)

|              | <b>r = 0.5s</b> | <b>r = 1.0s</b> | <b>r = 1.5s</b> | <b>r = 2.0s</b> | <b>C.L</b>    |
|--------------|-----------------|-----------------|-----------------|-----------------|---------------|
| <b>m = 2</b> | 26.1784         | 25.2067         | 25.0546         | 25.0574         | [-1.96, 1.96] |
| <b>m = 3</b> | 25.6751         | 25.1993         | 24.7623         | 24.7581         | [-1.96, 1.96] |
| <b>m = 4</b> | 23.5923         | 23.1723         | 22.6145         | 22.8501         | [-1.96, 1.96] |
| <b>m = 5</b> | 22.4327         | 22.3572         | 21.8252         | 22.2823         | [-1.96, 1.96] |

**Table 5.** BDS statistic results of daily rainfall(05 : Hongcheon)

|              | <b>r = 0.5s</b> | <b>r = 1.0s</b> | <b>r = 1.5s</b> | <b>r = 2.0s</b> | <b>C.L</b>    |
|--------------|-----------------|-----------------|-----------------|-----------------|---------------|
| <b>m = 2</b> | 24.9225         | 24.3917         | 24.2269         | 24.3571         | [-1.96, 1.96] |
| <b>m = 3</b> | 23.4477         | 23.3447         | 22.9816         | 22.9484         | [-1.96, 1.96] |
| <b>m = 4</b> | 24.8068         | 24.5085         | 24.109          | 23.919          | [-1.96, 1.96] |
| <b>m = 5</b> | 24.3353         | 24.1711         | 23.8061         | 23.7527         | [-1.96, 1.96] |

**Table 6.** BDS statistic results of daily rainfall(06 : Suwon)

|              | <b>r = 0.5s</b> | <b>r = 1.0s</b> | <b>r = 1.5s</b> | <b>r = 2.0s</b> | <b>C.L</b>    |
|--------------|-----------------|-----------------|-----------------|-----------------|---------------|
| <b>m = 2</b> | 22.7345         | 21.7448         | 21.1144         | 21.2345         | [-1.96, 1.96] |
| <b>m = 3</b> | 20.3766         | 19.5171         | 19.24           | 19.3863         | [-1.96, 1.96] |
| <b>m = 4</b> | 20.9731         | 19.9362         | 19.896          | 20.1339         | [-1.96, 1.96] |
| <b>m = 5</b> | 19.9076         | 18.9251         | 18.8191         | 19.5173         | [-1.96, 1.96] |

**Table 7.** BDS statistic results of daily rainfall(07 : Yanpyeong)

|              | <b>r = 0.5s</b> | <b>r = 1.0s</b> | <b>r = 1.5s</b> | <b>r = 2.0s</b> | <b>C.L</b>    |
|--------------|-----------------|-----------------|-----------------|-----------------|---------------|
| <b>m = 2</b> | 25.35           | 24.98           | 24.87           | 24.806          | [-1.96, 1.96] |
| <b>m = 3</b> | 23.617          | 23.486          | 23.469          | 23.659          | [-1.96, 1.96] |
| <b>m = 4</b> | 23.424          | 24.255          | 24.168          | 24.3            | [-1.96, 1.96] |
| <b>m = 5</b> | 23.569          | 23.854          | 23.2            | 23.039          | [-1.96, 1.96] |

**Table 8.** BDS statistic results of daily rainfall(08 : Icheon)

|              | <b>r = 0.5s</b> | <b>r = 1.0s</b> | <b>r = 1.5s</b> | <b>r = 2.0s</b> | <b>C.L</b>    |
|--------------|-----------------|-----------------|-----------------|-----------------|---------------|
| <b>m = 2</b> | 22.9472         | 22.4841         | 22.0212         | 22.2391         | [-1.96, 1.96] |
| <b>m = 3</b> | 21.3406         | 21.2188         | 21.2227         | 21.4963         | [-1.96, 1.96] |
| <b>m = 4</b> | 20.5619         | 20.4994         | 20.7515         | 21.1906         | [-1.96, 1.96] |
| <b>m = 5</b> | 21.9362         | 21.0529         | 21.3521         | 21.5262         | [-1.96, 1.96] |

**Table 9.** BDS statistic results of daily rainfall(09 : Geoje)

|              | <b>r = 0.5s</b> | <b>r = 1.0s</b> | <b>r = 1.5s</b> | <b>r = 2.0s</b> | <b>C.L</b>    |
|--------------|-----------------|-----------------|-----------------|-----------------|---------------|
| <b>m = 2</b> | 22.9776         | 21.5802         | 20.4294         | 20.4061         | [-1.96, 1.96] |
| <b>m = 3</b> | 18.0914         | 17.1927         | 16.3346         | 16.2536         | [-1.96, 1.96] |
| <b>m = 4</b> | 15.5594         | 14.1148         | 13.3638         | 13.3178         | [-1.96, 1.96] |
| <b>m = 5</b> | 14.7403         | 13.52           | 13.0707         | 12.9557         | [-1.96, 1.96] |

**Table 10.** BDS statistic results of daily rainfall(10 : Geochang)

|              | <b>r = 0.5s</b> | <b>r = 1.0s</b> | <b>r = 1.5s</b> | <b>r = 2.0s</b> | <b>C.L</b>    |
|--------------|-----------------|-----------------|-----------------|-----------------|---------------|
| <b>m = 2</b> | 25.2331         | 24.6556         | 23.681          | 23.7988         | [-1.96, 1.96] |
| <b>m = 3</b> | 21.6366         | 21.3032         | 21.0295         | 21.1194         | [-1.96, 1.96] |
| <b>m = 4</b> | 19.6597         | 19.4611         | 19.1889         | 19.2773         | [-1.96, 1.96] |
| <b>m = 5</b> | 21.4396         | 21.0383         | 20.7309         | 20.8331         | [-1.96, 1.96] |

**Table 11.** BDS statistic results of daily rainfall(11 : Namhae)

|              | <b>r = 0.5s</b> | <b>r = 1.0s</b> | <b>r = 1.5s</b> | <b>r = 2.0s</b> | <b>C.L</b>    |
|--------------|-----------------|-----------------|-----------------|-----------------|---------------|
| <b>m = 2</b> | 24.9499         | 23.649          | 22.7722         | 22.4435         | [-1.96, 1.96] |
| <b>m = 3</b> | 19.4503         | 18.6299         | 18.1407         | 18.312          | [-1.96, 1.96] |
| <b>m = 4</b> | 16.1395         | 15.3417         | 14.9269         | 14.9917         | [-1.96, 1.96] |
| <b>m = 5</b> | 13.5396         | 12.7719         | 12.105          | 12.1947         | [-1.96, 1.96] |

**Table 12.** BDS statistic results of daily rainfall(12 : Miryang)

|              | <b>r = 0.5s</b> | <b>r = 1.0s</b> | <b>r = 1.5s</b> | <b>r = 2.0s</b> | <b>C.L</b>    |
|--------------|-----------------|-----------------|-----------------|-----------------|---------------|
| <b>m = 2</b> | 22.4941         | 21.4865         | 20.8794         | 21.0334         | [-1.96, 1.96] |
| <b>m = 3</b> | 19.9129         | 18.9745         | 18.5476         | 18.7584         | [-1.96, 1.96] |
| <b>m = 4</b> | 17.2599         | 16.6486         | 16.6242         | 16.7211         | [-1.96, 1.96] |
| <b>m = 5</b> | 14.8872         | 14.2871         | 14.3524         | 14.7607         | [-1.96, 1.96] |

**Table 13.** BDS statistic results of daily rainfall(13 : Sancheong)

|              | <b>r = 0.5s</b> | <b>r = 1.0s</b> | <b>r = 1.5s</b> | <b>r = 2.0s</b> | <b>C.L</b>    |
|--------------|-----------------|-----------------|-----------------|-----------------|---------------|
| <b>m = 2</b> | 23.8059         | 23.0229         | 22.5115         | 22.693          | [-1.96, 1.96] |
| <b>m = 3</b> | 20.5477         | 19.5472         | 19.1168         | 19.3404         | [-1.96, 1.96] |
| <b>m = 4</b> | 20.3692         | 19.8828         | 19.4144         | 19.3983         | [-1.96, 1.96] |
| <b>m = 5</b> | 21.7293         | 21.4597         | 21.4971         | 21.308          | [-1.96, 1.96] |

**Table 14.** BDS statistic results of daily rainfall(14 : Jinju)

|              | <b>r = 0.5s</b> | <b>r = 1.0s</b> | <b>r = 1.5s</b> | <b>r = 2.0s</b> | <b>C.L</b>    |
|--------------|-----------------|-----------------|-----------------|-----------------|---------------|
| <b>m = 2</b> | 24.8205         | 23.8565         | 23.004          | 22.8882         | [-1.96, 1.96] |
| <b>m = 3</b> | 18.6141         | 17.5524         | 16.9941         | 17.2049         | [-1.96, 1.96] |
| <b>m = 4</b> | 17.2103         | 16.2117         | 15.7655         | 15.9027         | [-1.96, 1.96] |
| <b>m = 5</b> | 16.5188         | 15.9812         | 15.7115         | 15.9957         | [-1.96, 1.96] |

**Table 15.** BDS statistic results of daily rainfall(15 : Tongyeong)

|              | <b>r = 0.5s</b> | <b>r = 1.0s</b> | <b>r = 1.5s</b> | <b>r = 2.0s</b> | <b>C.L</b>    |
|--------------|-----------------|-----------------|-----------------|-----------------|---------------|
| <b>m = 2</b> | 21.6931         | 20.9368         | 20.0079         | 19.9319         | [-1.96, 1.96] |
| <b>m = 3</b> | 17.5475         | 17.2973         | 16.7046         | 16.6026         | [-1.96, 1.96] |
| <b>m = 4</b> | 14.6608         | 14.546          | 14.4154         | 14.5441         | [-1.96, 1.96] |
| <b>m = 5</b> | 13.9712         | 13.1702         | 12.9873         | 12.9957         | [-1.96, 1.96] |

**Table 16.** BDS statistic results of daily rainfall(16 : Hapcheon)

|              | <b>r = 0.5s</b> | <b>r = 1.0s</b> | <b>r = 1.5s</b> | <b>r = 2.0s</b> | <b>C.L</b>    |
|--------------|-----------------|-----------------|-----------------|-----------------|---------------|
| <b>m = 2</b> | 26.0024         | 25.0715         | 24.503          | 24.7578         | [-1.96, 1.96] |
| <b>m = 3</b> | 20.4628         | 20.2401         | 20.1992         | 20.5749         | [-1.96, 1.96] |
| <b>m = 4</b> | 18.6811         | 17.9047         | 17.6233         | 17.956          | [-1.96, 1.96] |
| <b>m = 5</b> | 19.5981         | 19.0637         | 18.6169         | 18.4279         | [-1.96, 1.96] |

**Table 17.** BDS statistic results of daily rainfall(17 : Gumi)

|              | <b>r = 0.5s</b> | <b>r = 1.0s</b> | <b>r = 1.5s</b> | <b>r = 2.0s</b> | <b>C.L</b>    |
|--------------|-----------------|-----------------|-----------------|-----------------|---------------|
| <b>m = 2</b> | 24.8819         | 24.7178         | 24.2047         | 24.237          | [-1.96, 1.96] |
| <b>m = 3</b> | 20.0799         | 20.6416         | 20.5847         | 20.5151         | [-1.96, 1.96] |
| <b>m = 4</b> | 17.6893         | 18.6254         | 18.5759         | 18.8313         | [-1.96, 1.96] |
| <b>m = 5</b> | 16.5572         | 17.3473         | 17.2825         | 17.3659         | [-1.96, 1.96] |

**Table 18.** BDS statistic results of daily rainfall(18 : Mugyeong)

|              | <b>r = 0.5s</b> | <b>r = 1.0s</b> | <b>r = 1.5s</b> | <b>r = 2.0s</b> | <b>C.L</b>    |
|--------------|-----------------|-----------------|-----------------|-----------------|---------------|
| <b>m = 2</b> | 26.6877         | 26.555          | 25.9121         | 26.1751         | [-1.96, 1.96] |
| <b>m = 3</b> | 21.7287         | 22.1433         | 21.8842         | 22.2038         | [-1.96, 1.96] |
| <b>m = 4</b> | 16.8946         | 17.9291         | 18.0526         | 18.377          | [-1.96, 1.96] |
| <b>m = 5</b> | 15.8638         | 16.773          | 16.9006         | 17.3109         | [-1.96, 1.96] |

**Table 19.** BDS statistic results of daily rainfall(19 : Yeongdeok)

|              | <b>r = 0.5s</b> | <b>r = 1.0s</b> | <b>r = 1.5s</b> | <b>r = 2.0s</b> | <b>C.L</b>    |
|--------------|-----------------|-----------------|-----------------|-----------------|---------------|
| <b>m = 2</b> | 22.8452         | 21.2667         | 19.8484         | 19.4153         | [-1.96, 1.96] |
| <b>m = 3</b> | 19.1526         | 17.9649         | 16.8948         | 16.3637         | [-1.96, 1.96] |
| <b>m = 4</b> | 15.4316         | 13.9162         | 13.1053         | 12.66           | [-1.96, 1.96] |
| <b>m = 5</b> | 14.6991         | 12.9443         | 11.7352         | 11.1525         | [-1.96, 1.96] |

**Table 20.** BDS statistic results of daily rainfall(20 : Yeongju)

|              | <b>r = 0.5s</b> | <b>r = 1.0s</b> | <b>r = 1.5s</b> | <b>r = 2.0s</b> | <b>C.L</b>    |
|--------------|-----------------|-----------------|-----------------|-----------------|---------------|
| <b>m = 2</b> | 26.7404         | 26.0846         | 25.7331         | 25.871          | [-1.96, 1.96] |
| <b>m = 3</b> | 21.2499         | 20.5613         | 20.334          | 20.5187         | [-1.96, 1.96] |
| <b>m = 4</b> | 17.4312         | 17.1089         | 16.919          | 16.9882         | [-1.96, 1.96] |
| <b>m = 5</b> | 16.3276         | 15.6931         | 15.3359         | 15.5686         | [-1.96, 1.96] |

**Table 21.** BDS statistic results of daily rainfall(21 : Yeongcheon)

|              | <b>r = 0.5s</b> | <b>r = 1.0s</b> | <b>r = 1.5s</b> | <b>r = 2.0s</b> | <b>C.L</b>    |
|--------------|-----------------|-----------------|-----------------|-----------------|---------------|
| <b>m = 2</b> | 22.34506        | 21.3236         | 20.41797        | 20.48872        | [-1.96, 1.96] |
| <b>m = 3</b> | 18.72876        | 18.55359        | 18.09673        | 18.1687         | [-1.96, 1.96] |
| <b>m = 4</b> | 17.46823        | 16.83335        | 16.24933        | 16.19694        | [-1.96, 1.96] |
| <b>m = 5</b> | 17.82231        | 17.77011        | 17.10341        | 17.07216        | [-1.96, 1.96] |

**Table 22.** BDS statistic results of daily rainfall(22 : Uljin)

|              | <b>r = 0.5s</b> | <b>r = 1.0s</b> | <b>r = 1.5s</b> | <b>r = 2.0s</b> | <b>C.L</b>    |
|--------------|-----------------|-----------------|-----------------|-----------------|---------------|
| <b>m = 2</b> | 22.705          | 21.358          | 19.918          | 19.17           | [-1.96, 1.96] |
| <b>m = 3</b> | 19.401          | 18.177          | 17.22           | 16.46           | [-1.96, 1.96] |
| <b>m = 4</b> | 15.376          | 14.176          | 13.383          | 12.734          | [-1.96, 1.96] |
| <b>m = 5</b> | 14.913          | 13.579          | 12.658          | 11.778          | [-1.96, 1.96] |

**Table 23.** BDS statistic results of daily rainfall(23 : Ulseong)

|              | <b>r = 0.5s</b> | <b>r = 1.0s</b> | <b>r = 1.5s</b> | <b>r = 2.0s</b> | <b>C.L</b>    |
|--------------|-----------------|-----------------|-----------------|-----------------|---------------|
| <b>m = 2</b> | 22.683          | 22.362          | 21.642          | 21.774          | [-1.96, 1.96] |
| <b>m = 3</b> | 18.953          | 18.526          | 17.919          | 18.09           | [-1.96, 1.96] |
| <b>m = 4</b> | 16.286          | 16.097          | 15.988          | 16.292          | [-1.96, 1.96] |
| <b>m = 5</b> | 15.348          | 15.885          | 16.178          | 16.555          | [-1.96, 1.96] |

**Table 24.** BDS statistic results of daily rainfall(24 : Pohang)

|              | <b>r = 0.5s</b> | <b>r = 1.0s</b> | <b>r = 1.5s</b> | <b>r = 2.0s</b> | <b>C.L</b>    |
|--------------|-----------------|-----------------|-----------------|-----------------|---------------|
| <b>m = 2</b> | 23.2037         | 21.7743         | 20.7901         | 20.7183         | [-1.96, 1.96] |
| <b>m = 3</b> | 17.154          | 17.0561         | 16.316          | 16.305          | [-1.96, 1.96] |
| <b>m = 4</b> | 15.6163         | 15.4561         | 14.6881         | 14.6095         | [-1.96, 1.96] |
| <b>m = 5</b> | 14.5647         | 14.372          | 13.745          | 13.4822         | [-1.96, 1.96] |

**Table 25.** BDS statistic results of daily rainfall(25 : Goheung)

|              | <b>r = 0.5s</b> | <b>r = 1.0s</b> | <b>r = 1.5s</b> | <b>r = 2.0s</b> | <b>C.L</b>    |
|--------------|-----------------|-----------------|-----------------|-----------------|---------------|
| <b>m = 2</b> | 24.3476         | 23.1182         | 22.7072         | 22.5451         | [-1.96, 1.96] |
| <b>m = 3</b> | 17.9009         | 17.422          | 17.324          | 17.8078         | [-1.96, 1.96] |
| <b>m = 4</b> | 14.1299         | 13.8087         | 13.915          | 14.4965         | [-1.96, 1.96] |
| <b>m = 5</b> | 12.2347         | 12.1431         | 12.1139         | 12.2226         | [-1.96, 1.96] |

**Table 26.** BDS statistic results of daily rainfall(26 : Mokpo)

|              | <b>r = 0.5s</b> | <b>r = 1.0s</b> | <b>r = 1.5s</b> | <b>r = 2.0s</b> | <b>C.L</b>    |
|--------------|-----------------|-----------------|-----------------|-----------------|---------------|
| <b>m = 2</b> | 21.0292         | 20.0217         | 19.5329         | 19.5219         | [-1.96, 1.96] |
| <b>m = 3</b> | 19.0581         | 18.5632         | 18.4335         | 18.3542         | [-1.96, 1.96] |
| <b>m = 4</b> | 17.2493         | 17.1283         | 17.0954         | 17.1993         | [-1.96, 1.96] |
| <b>m = 5</b> | 13.164          | 13.2854         | 13.6783         | 14.054          | [-1.96, 1.96] |

**Table 27.** BDS statistic results of daily rainfall(27 : Yeosu)

|              | <b>r = 0.5s</b> | <b>r = 1.0s</b> | <b>r = 1.5s</b> | <b>r = 2.0s</b> | <b>C.L</b>    |
|--------------|-----------------|-----------------|-----------------|-----------------|---------------|
| <b>m = 2</b> | 22.7754         | 21.9536         | 21.5018         | 21.4468         | [-1.96, 1.96] |
| <b>m = 3</b> | 17.9176         | 17.7998         | 17.3787         | 17.5247         | [-1.96, 1.96] |
| <b>m = 4</b> | 15.7671         | 15.5163         | 15.664          | 16.0805         | [-1.96, 1.96] |
| <b>m = 5</b> | 13.8776         | 13.5068         | 13.2689         | 13.4849         | [-1.96, 1.96] |

**Table 28.** BDS statistic results of daily rainfall(28 : Wando)

|              | <b>r = 0.5s</b> | <b>r = 1.0s</b> | <b>r = 1.5s</b> | <b>r = 2.0s</b> | <b>C.L</b>    |
|--------------|-----------------|-----------------|-----------------|-----------------|---------------|
| <b>m = 2</b> | 21.061          | 19.68           | 19.393          | 19.226          | [-1.96, 1.96] |
| <b>m = 3</b> | 17.299          | 16.76           | 16.664          | 16.76           | [-1.96, 1.96] |
| <b>m = 4</b> | 14.139          | 13.268          | 13.373          | 13.689          | [-1.96, 1.96] |
| <b>m = 5</b> | 11.662          | 11.499          | 11.73           | 12.032          | [-1.96, 1.96] |

**Table 29.** BDS statistic results of daily rainfall(29 : Jangheung)

|              | <b>r = 0.5s</b> | <b>r = 1.0s</b> | <b>r = 1.5s</b> | <b>r = 2.0s</b> | <b>C.L</b>    |
|--------------|-----------------|-----------------|-----------------|-----------------|---------------|
| <b>m = 2</b> | 26.7198         | 26.1141         | 26.0473         | 26.2643         | [-1.96, 1.96] |
| <b>m = 3</b> | 21.9189         | 22.2377         | 22.6488         | 23.0359         | [-1.96, 1.96] |
| <b>m = 4</b> | 18.5553         | 19.3599         | 19.8417         | 20.3801         | [-1.96, 1.96] |
| <b>m = 5</b> | 19.1371         | 19.8837         | 20.6964         | 21.2076         | [-1.96, 1.96] |

**Table 30.** BDS statistic results of daily rainfall(30 : Juam)

|              | <b>r = 0.5s</b> | <b>r = 1.0s</b> | <b>r = 1.5s</b> | <b>r = 2.0s</b> | <b>C.L</b>    |
|--------------|-----------------|-----------------|-----------------|-----------------|---------------|
| <b>m = 2</b> | 22.8452         | 21.2667         | 19.8484         | 19.4153         | [-1.96, 1.96] |
| <b>m = 3</b> | 19.1526         | 17.9649         | 16.8948         | 16.3637         | [-1.96, 1.96] |
| <b>m = 4</b> | 15.4316         | 13.9162         | 13.1053         | 12.6600         | [-1.96, 1.96] |
| <b>m = 5</b> | 14.6991         | 12.9443         | 11.7352         | 11.1525         | [-1.96, 1.96] |

**Table 31.** BDS statistic results of daily rainfall(31 : Haenam)

|              | <b>r = 0.5s</b> | <b>r = 1.0s</b> | <b>r = 1.5s</b> | <b>r = 2.0s</b> | <b>C.L</b>    |
|--------------|-----------------|-----------------|-----------------|-----------------|---------------|
| <b>m = 2</b> | 19.7528         | 18.877          | 18.5157         | 18.4108         | [-1.96, 1.96] |
| <b>m = 3</b> | 16.5279         | 15.651          | 15.6253         | 15.8452         | [-1.96, 1.96] |
| <b>m = 4</b> | 15.1294         | 14.3767         | 14.4139         | 14.8028         | [-1.96, 1.96] |
| <b>m = 5</b> | 13.7971         | 13.1939         | 13.0559         | 13.5162         | [-1.96, 1.96] |

**Table 32.** BDS statistic results of daily rainfall(32 : Gunsan)

|              | <b>r = 0.5s</b> | <b>r = 1.0s</b> | <b>r = 1.5s</b> | <b>r = 2.0s</b> | <b>C.L</b>    |
|--------------|-----------------|-----------------|-----------------|-----------------|---------------|
| <b>m = 2</b> | 23.3172         | 23.2687         | 22.4752         | 22.0749         | [-1.96, 1.96] |
| <b>m = 3</b> | 17.5494         | 17.9413         | 17.9257         | 18.3579         | [-1.96, 1.96] |
| <b>m = 4</b> | 14.4674         | 15.6207         | 15.9615         | 16.2304         | [-1.96, 1.96] |
| <b>m = 5</b> | 12.6142         | 13.9997         | 14.6579         | 15.1106         | [-1.96, 1.96] |

**Table 33.** BDS statistic results of daily rainfall(33 : Namwon)

|              | <b>r = 0.5s</b> | <b>r = 1.0s</b> | <b>r = 1.5s</b> | <b>r = 2.0s</b> | <b>C.L</b>    |
|--------------|-----------------|-----------------|-----------------|-----------------|---------------|
| <b>m = 2</b> | 41.2072         | 42.2374         | 42.6837         | 43.2225         | [-1.96, 1.96] |
| <b>m = 3</b> | 37.0356         | 38.5332         | 38.8485         | 39.0007         | [-1.96, 1.96] |
| <b>m = 4</b> | 31.8247         | 33.3775         | 34.3097         | 35.0255         | [-1.96, 1.96] |
| <b>m = 5</b> | 28.2038         | 30.0558         | 31.39           | 32.2554         | [-1.96, 1.96] |

**Table 34.** BDS statistic results of daily rainfall(34 : Buan)

|              | <b>r = 0.5s</b> | <b>r = 1.0s</b> | <b>r = 1.5s</b> | <b>r = 2.0s</b> | <b>C.L</b>    |
|--------------|-----------------|-----------------|-----------------|-----------------|---------------|
| <b>m = 2</b> | 21.5408         | 20.2166         | 18.7723         | 18.5094         | [-1.96, 1.96] |
| <b>m = 3</b> | 16.8101         | 16.0982         | 14.8953         | 14.6118         | [-1.96, 1.96] |
| <b>m = 4</b> | 13.961          | 13.6505         | 12.6566         | 12.3813         | [-1.96, 1.96] |
| <b>m = 5</b> | 12.4271         | 12.5726         | 12.1772         | 12.1766         | [-1.96, 1.96] |

**Table 35.** BDS statistic results of daily rainfall(35 : Imsil)

|              | <b>r = 0.5s</b> | <b>r = 1.0s</b> | <b>r = 1.5s</b> | <b>r = 2.0s</b> | <b>C.L</b>    |
|--------------|-----------------|-----------------|-----------------|-----------------|---------------|
| <b>m = 2</b> | 24.7489         | 24.1326         | 23.299          | 23.3448         | [-1.96, 1.96] |
| <b>m = 3</b> | 21.0694         | 21.0738         | 20.6445         | 21.0626         | [-1.96, 1.96] |
| <b>m = 4</b> | 20.358          | 20.8561         | 20.623          | 21.1636         | [-1.96, 1.96] |
| <b>m = 5</b> | 19.3653         | 20.4556         | 20.4091         | 20.8525         | [-1.96, 1.96] |

**Table 36.** BDS statistic results of daily rainfall(36 : Yeongju)

|              | <b>r = 0.5s</b> | <b>r = 1.0s</b> | <b>r = 1.5s</b> | <b>r = 2.0s</b> | <b>C.L</b>    |
|--------------|-----------------|-----------------|-----------------|-----------------|---------------|
| <b>m = 2</b> | 26.7404         | 26.0846         | 25.7331         | 25.871          | [-1.96, 1.96] |
| <b>m = 3</b> | 21.2499         | 20.5613         | 20.334          | 20.5187         | [-1.96, 1.96] |
| <b>m = 4</b> | 17.4312         | 17.1089         | 16.919          | 16.9882         | [-1.96, 1.96] |
| <b>m = 5</b> | 16.3276         | 15.6931         | 15.3359         | 15.5686         | [-1.96, 1.96] |

**Table 37.** BDS statistic results of daily rainfall(37 : Jeongeup)

|              | <b>r = 0.5s</b> | <b>r = 1.0s</b> | <b>r = 1.5s</b> | <b>r = 2.0s</b> | <b>C.L</b>    |
|--------------|-----------------|-----------------|-----------------|-----------------|---------------|
| <b>m = 2</b> | 22.3631         | 21.2129         | 20.0728         | 19.8187         | [-1.96, 1.96] |
| <b>m = 3</b> | 20.5743         | 20.7927         | 20.4213         | 20.4122         | [-1.96, 1.96] |
| <b>m = 4</b> | 18.6582         | 19.8877         | 20.3923         | 20.6557         | [-1.96, 1.96] |
| <b>m = 5</b> | 15.5472         | 17.5546         | 18.0765         | 18.3741         | [-1.96, 1.96] |

**Table 38.** BDS statistic results of daily rainfall(38 : Geumsan)

|              | <b>r = 0.5s</b> | <b>r = 1.0s</b> | <b>r = 1.5s</b> | <b>r = 2.0s</b> | <b>C.L</b>    |
|--------------|-----------------|-----------------|-----------------|-----------------|---------------|
| <b>m = 2</b> | 23.6009         | 23.2573         | 22.9874         | 22.8955         | [-1.96, 1.96] |
| <b>m = 3</b> | 22.3132         | 21.8723         | 21.4214         | 21.3802         | [-1.96, 1.96] |
| <b>m = 4</b> | 19.8085         | 20.6599         | 20.7871         | 20.9235         | [-1.96, 1.96] |
| <b>m = 5</b> | 16.4702         | 17.843          | 18.0599         | 18.2174         | [-1.96, 1.96] |

**Table 39.** BDS statistic results of daily rainfall(39 : Boryeong)

|              | <b>r = 0.5s</b> | <b>r = 1.0s</b> | <b>r = 1.5s</b> | <b>r = 2.0s</b> | <b>C.L</b>    |
|--------------|-----------------|-----------------|-----------------|-----------------|---------------|
| <b>m = 2</b> | 20.025          | 19.6896         | 19.2208         | 19.2869         | [-1.96, 1.96] |
| <b>m = 3</b> | 16.275          | 16.499          | 16.7737         | 17.2764         | [-1.96, 1.96] |
| <b>m = 4</b> | 13.4623         | 13.9356         | 14.1088         | 14.6885         | [-1.96, 1.96] |
| <b>m = 5</b> | 12.3465         | 12.8542         | 13.4062         | 14.2365         | [-1.96, 1.96] |

**Table 40.** BDS statistic results of daily rainfall(40 : Buyeo)

|              | <b>r = 0.5s</b> | <b>r = 1.0s</b> | <b>r = 1.5s</b> | <b>r = 2.0s</b> | <b>C.L</b>    |
|--------------|-----------------|-----------------|-----------------|-----------------|---------------|
| <b>m = 2</b> | 22.4099         | 22.055          | 21.6483         | 21.5029         | [-1.96, 1.96] |
| <b>m = 3</b> | 17.6281         | 18.5684         | 18.9771         | 19.4572         | [-1.96, 1.96] |
| <b>m = 4</b> | 15.5171         | 16.0516         | 16.1802         | 16.7584         | [-1.96, 1.96] |
| <b>m = 5</b> | 14.8872         | 15.0379         | 14.9444         | 15.3648         | [-1.96, 1.96] |



**Table 41.** BDS statistic results of daily rainfall(41 : Seosan)

|              | <b>r = 0.5s</b> | <b>r = 1.0s</b> | <b>r = 1.5s</b> | <b>r = 2.0s</b> | <b>C.L</b>    |
|--------------|-----------------|-----------------|-----------------|-----------------|---------------|
| <b>m = 2</b> | 20.5617         | 19.7588         | 18.8543         | 18.7837         | [-1.96, 1.96] |
| <b>m = 3</b> | 18.2284         | 17.443          | 17.0835         | 17.1427         | [-1.96, 1.96] |
| <b>m = 4</b> | 17.0626         | 16.5366         | 16.1788         | 16.4183         | [-1.96, 1.96] |
| <b>m = 5</b> | 14.7873         | 14.2017         | 13.6488         | 13.9773         | [-1.96, 1.96] |

**Table 42.** BDS statistic results of daily rainfall(42 : Cheonan)

|              | <b>r = 0.5s</b> | <b>r = 1.0s</b> | <b>r = 1.5s</b> | <b>r = 2.0s</b> | <b>C.L</b>    |
|--------------|-----------------|-----------------|-----------------|-----------------|---------------|
| <b>m = 2</b> | 23.3592         | 22.7222         | 22.6876         | 22.9853         | [-1.96, 1.96] |
| <b>m = 3</b> | 19.022          | 18.4213         | 18.6135         | 18.8912         | [-1.96, 1.96] |
| <b>m = 4</b> | 16.8915         | 17.136          | 17.6758         | 18.2909         | [-1.96, 1.96] |
| <b>m = 5</b> | 15.8228         | 15.9458         | 16.6875         | 17.4076         | [-1.96, 1.96] |

**Table 43.** BDS statistic results of daily rainfall(43 : Boeun)

|              | <b>r = 0.5s</b> | <b>r = 1.0s</b> | <b>r = 1.5s</b> | <b>r = 2.0s</b> | <b>C.L</b>    |
|--------------|-----------------|-----------------|-----------------|-----------------|---------------|
| <b>m = 2</b> | 24.6424         | 24.5003         | 24.2722         | 24.2439         | [-1.96, 1.96] |
| <b>m = 3</b> | 20.3537         | 21.2114         | 21.82           | 22.5116         | [-1.96, 1.96] |
| <b>m = 4</b> | 20.8617         | 21.3934         | 21.4146         | 21.964          | [-1.96, 1.96] |
| <b>m = 5</b> | 20.9669         | 22.1663         | 21.8573         | 22.0916         | [-1.96, 1.96] |

**Table 44.** BDS statistic results of daily rainfall(44 : Jechoen)

|              | <b>r = 0.5s</b> | <b>r = 1.0s</b> | <b>r = 1.5s</b> | <b>r = 2.0s</b> | <b>C.L</b>    |
|--------------|-----------------|-----------------|-----------------|-----------------|---------------|
| <b>m = 2</b> | 25.3542         | 25.0938         | 24.6629         | 24.8069         | [-1.96, 1.96] |
| <b>m = 3</b> | 20.9500         | 21.8499         | 22.018          | 22.3852         | [-1.96, 1.96] |
| <b>m = 4</b> | 20.3524         | 20.8502         | 21.2983         | 21.3973         | [-1.96, 1.96] |
| <b>m = 5</b> | 19.5249         | 20.2799         | 20.7137         | 21.0253         | [-1.96, 1.96] |

**Table 45.** BDS statistic results of daily rainfall(45 : Cehongju)

|              | <b>r = 0.5s</b> | <b>r = 1.0s</b> | <b>r = 1.5s</b> | <b>r = 2.0s</b> | <b>C.L</b>    |
|--------------|-----------------|-----------------|-----------------|-----------------|---------------|
| <b>m = 2</b> | 22.6959         | 22.7536         | 22.3198         | 22.1467         | [-1.96, 1.96] |
| <b>m = 3</b> | 19.0630         | 19.4147         | 19.5917         | 19.8901         | [-1.96, 1.96] |
| <b>m = 4</b> | 18.9811         | 18.9974         | 19.3449         | 19.6768         | [-1.96, 1.96] |
| <b>m = 5</b> | 17.9944         | 18.1654         | 18.7573         | 19.0654         | [-1.96, 1.96] |

**Table 46.** BDS statistic results of daily rainfall(46 : Chupungyeong)

|              | <b>r = 0.5s</b> | <b>r = 1.0s</b> | <b>r = 1.5s</b> | <b>r = 2.0s</b> | <b>C.L</b>    |
|--------------|-----------------|-----------------|-----------------|-----------------|---------------|
| <b>m = 2</b> | 24.4349         | 24.2553         | 23.9049         | 23.841          | [-1.96, 1.96] |
| <b>m = 3</b> | 20.4686         | 21.3146         | 21.3267         | 21.557          | [-1.96, 1.96] |
| <b>m = 4</b> | 17.4575         | 18.6534         | 18.7478         | 19.1628         | [-1.96, 1.96] |
| <b>m = 5</b> | 18.3635         | 19.7618         | 19.7519         | 19.9005         | [-1.96, 1.96] |

**Table 47.** BDS statistic results of daily rainfall(47 : Chungju)

|              | <b>r = 0.5s</b> | <b>r = 1.0s</b> | <b>r = 1.5s</b> | <b>r = 2.0s</b> | <b>C.L</b>    |
|--------------|-----------------|-----------------|-----------------|-----------------|---------------|
| <b>m = 2</b> | 23.8460         | 23.5059         | 23.2243         | 23.0662         | [-1.96, 1.96] |
| <b>m = 3</b> | 20.9195         | 21.3074         | 21.6122         | 21.7967         | [-1.96, 1.96] |
| <b>m = 4</b> | 20.7824         | 21.3426         | 21.4686         | 21.3755         | [-1.96, 1.96] |
| <b>m = 5</b> | 20.5351         | 20.955          | 21.1657         | 20.972          | [-1.96, 1.96] |

**Table 48.** BDS statistic results of daily rainfall(48 : Ganghwa)

|              | <b>r = 0.5s</b> | <b>r = 1.0s</b> | <b>r = 1.5s</b> | <b>r = 2.0s</b> | <b>C.L</b>    |
|--------------|-----------------|-----------------|-----------------|-----------------|---------------|
| <b>m = 2</b> | 24.6523         | 23.8116         | 23.4285         | 23.4081         | [-1.96, 1.96] |
| <b>m = 3</b> | 23.8054         | 23.1632         | 22.7352         | 22.8128         | [-1.96, 1.96] |
| <b>m = 4</b> | 22.4729         | 21.9718         | 21.7561         | 21.8562         | [-1.96, 1.96] |
| <b>m = 5</b> | 21.0642         | 19.9316         | 19.228          | 19.219          | [-1.96, 1.96] |

**Table 49.** BDS statistic results of daily rainfall(49 : Incheon)

|              | <b>r = 0.5s</b> | <b>r = 1.0s</b> | <b>r = 1.5s</b> | <b>r = 2.0s</b> | <b>C.L</b>    |
|--------------|-----------------|-----------------|-----------------|-----------------|---------------|
| <b>m = 2</b> | 22.7003         | 21.9719         | 21.399          | 21.2583         | [-1.96, 1.96] |
| <b>m = 3</b> | 20.0557         | 19.5866         | 19.1922         | 19.1457         | [-1.96, 1.96] |
| <b>m = 4</b> | 20.3016         | 19.9688         | 19.8219         | 19.9576         | [-1.96, 1.96] |
| <b>m = 5</b> | 19.6772         | 18.7477         | 18.6472         | 18.7517         | [-1.96, 1.96] |

**Table 50.** BDS statistic results of daily rainfall(50 : Gwangju)

|              | <b>r = 0.5s</b> | <b>r = 1.0s</b> | <b>r = 1.5s</b> | <b>r = 2.0s</b> | <b>C.L</b>    |
|--------------|-----------------|-----------------|-----------------|-----------------|---------------|
| <b>m = 2</b> | 21.3686         | 20.6299         | 20.5563         | 20.7307         | [-1.96, 1.96] |
| <b>m = 3</b> | 18.3768         | 18.6654         | 18.626          | 19.0164         | [-1.96, 1.96] |
| <b>m = 4</b> | 15.7136         | 16.7762         | 17.6307         | 18.0011         | [-1.96, 1.96] |
| <b>m = 5</b> | 16.7275         | 17.4040         | 17.9184         | 18.2367         | [-1.96, 1.96] |

**Table 51.** BDS statistic results of daily rainfall(51 : Daegu)

|              | <b>r = 0.5s</b> | <b>r = 1.0s</b> | <b>r = 1.5s</b> | <b>r = 2.0s</b> | <b>C.L</b>    |
|--------------|-----------------|-----------------|-----------------|-----------------|---------------|
| <b>m = 2</b> | 23.2108         | 22.4697         | 21.5245         | 21.4005         | [-1.96, 1.96] |
| <b>m = 3</b> | 19.2055         | 18.8923         | 18.0644         | 18.0481         | [-1.96, 1.96] |
| <b>m = 4</b> | 18.5409         | 17.9936         | 17.6119         | 17.465          | [-1.96, 1.96] |
| <b>m = 5</b> | 19.2836         | 18.9301         | 18.6309         | 18.5025         | [-1.96, 1.96] |

**Table 52.** BDS statistic results of daily rainfall(52 : Daejeon)

|              | <b>r = 0.5s</b> | <b>r = 1.0s</b> | <b>r = 1.5s</b> | <b>r = 2.0s</b> | <b>C.L</b>    |
|--------------|-----------------|-----------------|-----------------|-----------------|---------------|
| <b>m = 2</b> | 23.1413         | 23.3247         | 23.1242         | 23.3388         | [-1.96, 1.96] |
| <b>m = 3</b> | 19.4035         | 19.9921         | 20.0759         | 20.4002         | [-1.96, 1.96] |
| <b>m = 4</b> | 18.7677         | 19.5131         | 19.696          | 19.7935         | [-1.96, 1.96] |
| <b>m = 5</b> | 17.5787         | 18.5561         | 18.4767         | 18.8271         | [-1.96, 1.96] |

**Table 53.** BDS statistic results of daily rainfall(53 : Busan)

|              | <b>r = 0.5s</b> | <b>r = 1.0s</b> | <b>r = 1.5s</b> | <b>r = 2.0s</b> | <b>C.L</b>    |
|--------------|-----------------|-----------------|-----------------|-----------------|---------------|
| <b>m = 2</b> | 23.0398         | 22.9659         | 22.2452         | 21.9735         | [-1.96, 1.96] |
| <b>m = 3</b> | 16.7995         | 18.1613         | 18.4448         | 18.5958         | [-1.96, 1.96] |
| <b>m = 4</b> | 15.9574         | 17.4031         | 17.4937         | 17.8016         | [-1.96, 1.96] |
| <b>m = 5</b> | 13.5764         | 14.3287         | 14.3267         | 14.7029         | [-1.96, 1.96] |

**Table 54.** BDS statistic results of daily rainfall(54 : Seoul)

|              | <b>r = 0.5s</b> | <b>r = 1.0s</b> | <b>r = 1.5s</b> | <b>r = 2.0s</b> | <b>C.L</b>    |
|--------------|-----------------|-----------------|-----------------|-----------------|---------------|
| <b>m = 2</b> | 23.4914         | 22.5182         | 22.4727         | 22.5975         | [-1.96, 1.96] |
| <b>m = 3</b> | 20.8234         | 20.4096         | 20.513          | 20.7658         | [-1.96, 1.96] |
| <b>m = 4</b> | 22.3081         | 21.6534         | 21.6065         | 22.0250         | [-1.96, 1.96] |
| <b>m = 5</b> | 21.3374         | 21.3777         | 21.2002         | 21.6694         | [-1.96, 1.96] |

**Table 55.** BDS statistic results of daily rainfall(55 : Ulsan)

|              | <b>r = 0.5s</b> | <b>r = 1.0s</b> | <b>r = 1.5s</b> | <b>r = 2.0s</b> | <b>C.L</b>    |
|--------------|-----------------|-----------------|-----------------|-----------------|---------------|
| <b>m = 2</b> | 22.8733         | 21.7343         | 21.42           | 21.3051         | [-1.96, 1.96] |
| <b>m = 3</b> | 18.1781         | 17.5146         | 16.9722         | 16.7856         | [-1.96, 1.96] |
| <b>m = 4</b> | 15.1023         | 14.5877         | 14.3096         | 14.2363         | [-1.96, 1.96] |
| <b>m = 5</b> | 13.9779         | 13.986          | 13.4707         | 13.3655         | [-1.96, 1.96] |
